# Supplementary material for: Performance, workload, and usability in a multiscreen, multi-device, information-rich environment
Source: PeerJ Comput Sci. 2018 Sep 10;4:e162. doi: 10.7717/peerj-cs.162 (PMC7924668; doi:10.7717/peerj-cs.162)
Supplement: Supplemental Information 2 [file peerj-cs-04-162-s002.xlsx]

## Sheet: Errors and Time
Participant #	Layout	Role	Time (sec)	Total Errors		Participant #	Layout	Role	Time (sec)	Total Errors
1	A	RTC	570	6		1	A	RTC	570	6
1	B	FTC	615	7		2	A	Jackman	590	5
1	C	Jackman	470	8		3	A	RTC	574	7
2	A	Jackman	590	5		4	A	RTC	655	5
2	B	RTC	835			5	A	RTC	559	4
2	C	FTC	595	6		6	A	RTC	732	6
3	A	RTC	574	7		7	A	Jackman	677	9
3	B	FTC	510			8	A	RTC	220	9
3	C	Jackman	650	4		9	A	FTC	520	8
4	A	RTC	655	5		10	A	FTC	470	9
4	B	FTC	395	3		11	A	Jackman	475	5
4	C	Jackman	445	6		12	A	FTC	955	3
5	A	RTC	559	4		13	A	Jackman	715	6
5	B	FTC	505	6		14	A	FTC	355	6
5	C	Jackman	645	8		15	A	RTC	640	4
6	A	RTC	732	6		16	A	Jackman	740	7
6	B	Jackman	430	4		17	A	Jackman	735	8
6	C	FTC	680	8		18	A	Jackman	550	2
7	A	Jackman	677	9		1	B	FTC	615	7
7	B	RTC	530	6		2	B	RTC	835
7	C	FTC	520	8		3	B	FTC	510
8	A	RTC	220	9		4	B	FTC	395	3
8	B	Jackman	99	9		5	B	FTC	505	6
8	C	FTC	185	12		6	B	Jackman	430	4
9	A	FTC	520	8		7	B	RTC	530	6
9	B	Jackman	470	3		8	B	Jackman	99	9
9	C	RTC	725	9		9	B	Jackman	470	3
10	A	FTC	470	9		10	B	RTC	340	6
10	B	RTC	340	6		11	B	FTC	715	5
10	C	Jackman	290	8		12	B	RTC	870	4
11	A	Jackman	475	5		13	B	FTC	905	3
11	B	FTC	715	5		14	B	RTC	525	5
11	C	RTC	520	3		15	B	FTC	745	7
12	A	FTC	955	3		16	B	RTC	445	7
12	B	RTC	870	4		17	B	RTC	810	4
12	C	Jackman	970	6		18	B	FTC	390	5
13	A	Jackman	715	6		1	C	Jackman	470	8
13	B	FTC	905	3		2	C	FTC	595	6
13	C	RTC	680	4		3	C	Jackman	650	4
14	A	FTC	355	6		4	C	Jackman	445	6
14	B	RTC	525	5		5	C	Jackman	645	8
14	C	Jackman	630	5		6	C	FTC	680	8
15	A	RTC	640	4		7	C	FTC	520	8
15	B	FTC	745	7		8	C	FTC	185	12
15	C	Jackman	850	5		9	C	RTC	725	9
16	A	Jackman	740	7		10	C	Jackman	290	8
16	B	RTC	445	7		11	C	RTC	520	3
16	C	FTC	405	8		12	C	Jackman	970	6
17	A	Jackman	735	8		13	C	RTC	680	4
17	B	RTC	810	4		14	C	Jackman	630	5
17	C	FTC	830	9		15	C	Jackman	850	5
18	A	Jackman	550	2		16	C	FTC	405	8
18	B	FTC	390	5		17	C	FTC	830	9
18	C	RTC	525	5		18	C	RTC	525	5

## Sheet:  NASA TLX data
Participant	Layout	Mental Demand	Physical Demand	Temporal Demand	Performance	Effort	Frustration	TOT_COMP			Mental Demand	Physical Demand	Temporal Demand	Performance	Effort	Frustration	TOT-COMP
1									A	1	80	10	35	20	65	25	39.1667
	A	80	10	35	20	65	25	39.1667		2	65	30	60	30	60	45	48.3333
	B	40	10	25	10	35	30	25		3	50	10	35	35	30	10	28.3333
	C	45	10	30	85	40	45	42.5		4	60	5	35	30	40	5	29.1667
2										5	75	15	35	55	75	15	45
	A	65	30	60	30	60	45	48.3333		6	70	40	60	35	70	80	59.1667
	B	80	5	70	85	70	75	64.1667		7	55	20	60	30	50	50	44.1667
	C	70	40	60	30	65	30	49.1667		8	80	60	60	30	70	45	57.5
3										9	65	25	55	40	65	70	53.3333
	A	50	10	35	35	30	10	28.3333		10	30	5	60	15	40	15	27.5
	B	50	10	15	50	30	15	28.3333		11	90	20	60	25	75	25	49.1667
	C	50	15	50	35	30	10	31.6667		12	60	30	40	55	55	50	48.3333
4										13	55	40	60	55	65	75	58.3333
	A	60	5	35	30	40	5	29.1667		14	30	10	5	80	45	10	30
	B	35	10	15	35	25	15	22.5		15	45	20	25	25	40	15	28.3333
	C	15	20	20	20	30	45	25		16	30	10	35	20	25	20	23.3333
5										17	25	25	25	5	35	5	20
	A	75	15	35	55	75	15	45		18	10	5	15	95	15	10	25
	B	65	15	30	65	80	15	45		AVE	54.1667	21.1111	42.2222	37.7778	51.1111	31.6667	39.6759
	C	75	15	35	55	75	15	45	B	1	40	10	25	10	35	30	25
6										2	80	5	70	85	70	75	64.1667
	A	70	40	60	35	70	80	59.1667		3	50	10	15	50	30	15	28.3333
	B	20	30	35	20	25	20	25		4	35	10	15	35	25	15	22.5
	C	50	15	70	20	50	30	39.1667		5	65	15	30	65	80	15	45
7										6	20	30	35	20	25	20	25
	A	55	20	60	30	50	50	44.1667		7	35	30	35	55	50	70	45.8333
	B	35	30	35	55	50	70	45.8333		8	90	40	90	40	70	85	69.1667
	C	35	10	10	50	30	40	29.1667		9	55	55	60	25	40	35	45
8										10	35	10	65	15	20	5	25
	A	80	60	60	30	70	45	57.5		11	85	15	40	20	80	15	42.5
	B	90	40	90	40	70	85	69.1667		12	50	25	40	75	20	60	45
	C	70	60	60	45	75	70	63.3333		13	35	40	35	30	35	55	38.3333
9										14	35	5	20	80	30	5	29.1667
	A	65	25	55	40	65	70	53.3333		15	35	15	40	15	25	15	24.1667
	B	55	55	60	25	40	35	45		16	30	5	25	15	35	5	19.1667
	C	40	40	65	30	45	40	43.3333		17	55	75	55	5	75	40	50.8333
10										18	10	5	15	90	20	10	25
	A	30	5	60	15	40	15	27.5		AVE	46.6667	22.2222	39.4444	40.5556	42.5	31.6667	37.1759
	B	35	10	65	15	20	5	25	C	1	45	10	30	85	40	45	42.5
	C	40	5	65	10	20	5	24.1667		2	70	40	60	30	65	30	49.1667
11										3	50	15	50	35	30	10	31.6667
	A	90	20	60	25	75	25	49.1667		4	15	20	20	20	30	45	25
	B	85	15	40	20	80	15	42.5		5	75	15	35	55	75	15	45
	C	75	15	45	15	75	15	40		6	50	15	70	20	50	30	39.1667
12										7	35	10	10	50	30	40	29.1667
	A	60	30	40	55	55	50	48.3333		8	70	60	60	45	75	70	63.3333
	B	50	25	40	75	20	60	45		9	40	40	65	30	45	40	43.3333
	C	75	10	40	60	60	50	49.1667		10	40	5	65	10	20	5	24.1667
13										11	75	15	45	15	75	15	40
	A	55	40	60	55	65	75	58.3333		12	75	10	40	60	60	50	49.1667
	B	35	40	35	30	35	55	38.3333		13	25	40	35	30	35	30	32.5
	C	25	40	35	30	35	30	32.5		14	35	15	5	80	40	5	30
14										15	30	25	45	20	40	40	33.3333
	A	30	10	5	80	45	10	30		16	40	20	20	15	35	5	22.5
	B	35	5	20	80	30	5	29.1667		17	55	65	85	60	85	90	73.3333
	C	35	15	5	80	40	5	30		18	40	5	50	80	15	5	32.5
15										AVE	48.0556	23.6111	43.8889	41.1111	46.9444	31.6667	39.213
	A	45	20	25	25	40	15	28.3333
	B	35	15	40	15	25	15	24.1667
	C	30	25	45	20	40	40	33.3333
16
	A	30	10	35	20	25	20	23.3333
	B	30	5	25	15	35	5	19.1667
	C	40	20	20	15	35	5	22.5
17
	A	25	25	25	5	35	5	20
	B	55	75	55	5	75	40	50.8333
	C	55	65	85	60	85	90	73.3333
18
	A	10	5	15	95	15	10	25
	B	10	5	15	90	20	10	25
	C	40	5	50	80	15	5	32.5

## Sheet: CSUQ data 
Participant	Layout	Q1	Q2	Q3	Q4	Q5	Q6	Q7	Q8	Q10	Q11	Q12	Q13	Q14	Q15	Q16	Q17	Q18	Q19	OVERALL	SYS USE	INFO QUAL	INTER QUAL		SUBJ	COND	OVERALL	SYS USE	INFO QUAL	INTER QUAL
																									1	A	4.11111	4.125	4.66667	3.33333
P01	A	3	5	5	3	3	5	5	4	4	5	5	5	5	4	2	2	6	3	4.11111	4.125	4.66667	3.33333		1	B	6.05556	6.125	5.5	7
P02	A	7	7	7	7	7	7	7	7	7	6	6	6	6	6	6	6	6	6	6.5	7	6.16667	6		1	C	5.55556	5.625	5.66667	5.33333
P03	A	5	6	5	4	4	6	6	6	6	6	6	6	6	5	6	6	6	6	5.61111	5.25	5.83333	6		2	A	6.5	7	6.16667	6
P04	A	3	4	3	2	1	5	5	3	7	1	5	5	3	2	2	2	7	5	3.61111	3.25	3.83333	3.66667		2	B	5.44444	5.375	5.16667	6
P05	A	6	6	6	6	5	6	6	6	6	6	6	6	6	6	6	5	6	6	5.88889	5.875	6	5.66667		2	C	6	6	6	6
P06	A	3	3	2	3	2	5	4	6	5	3	2	4	3	2	1	1	2	2	2.94444	3.5	3.16667	1.33333		3	A	5.61111	5.25	5.83333	6
P07	A	5	4	5	4	4	6	5	6	2	3	2	5	6	5	3	1	2	4	4	4.875	3.83333	2		3	B	7	7	7	7
P08	A	6	6	5	5	5	6	6	5	4	6	6	6	6	6	6	6	6	6	5.66667	5.5	5.66667	6		3	C	6.05556	6	6	6.33333
P09	A	4	4	6	5	5	7	7	5	5	5	3	4	5	3	5	5	6	5	4.94444	5.375	4.16667	5.33333		4	A	3.61111	3.25	3.83333	3.66667
P10	A	5	5	5	5	5	5	5	5	6	7	6	6	7	6	6	6	6	5	5.61111	5	6.33333	6		4	B	5.44444	5.625	5	6
P11	A	5	5	5	4	4	5	6	5	5	5	5	6	6	4	4	5	6	5	5	4.875	5.16667	5		4	C	3.88889	3.875	4.83333	2.33333
P12	A	4	4	3	4	4	6	6	5	5	4	3	4	5	4	3	4	6	4	4.33333	4.5	4.16667	4.33333		5	A	5.88889	5.875	6	5.66667
P13	A	4	3	3	3	3	5	4	3	3	4	4	4	5	6	4	3	5	4	3.88889	3.5	4.33333	4		5	B	6	6	6	6
P14	A	4	6	5	5	4	5	7	6	6	7	6	7	7	6	4	4	7	5	5.61111	5.25	6.5	5		5	C	5.66667	5.75	5.83333	5.33333
P15	A	5	4	6	5	5	7	6	6	6	5	5	5	5	6	6	6	6	5	5.5	5.5	5.33333	6		6	A	2.94444	3.5	3.16667	1.33333
P16	A	3	5	4	4	4	5	5	3	4	5	6	6	6	5	2	2	7	4	4.44444	4.125	5.33333	3.66667		6	B	5.72222	5.5	5.83333	6
P17	A	7	7	7	7	7	7	7	7	4	6	6	7	6	6	7	7	7	6	6.55556	7	5.83333	7		6	C	5.83333	5.75	5.83333	6
P18	A	5	6	5	7	4	5	7	5	6	6	6	6	6	6	6	3	6	5	5.55556	5.5	6	5		7	A	4	4.875	3.83333	2
AVE		4.66667	5	4.83333	4.61111	4.22222	5.72222	5.77778	5.16667	5.05556	5	4.88889	5.44444	5.5	4.88889	4.38889	4.11111	5.72222	4.77778	4.98765	5	5.12963	4.74074		7	B	3.17647	3.14286	3.5	3
																									7	C	3.72222	4.125	3.16667	4
P01	B	6	5	6	6	6	7	6	7	6	4	6	5	5	7	7	7	7	6	6.05556	6.125	5.5	7		8	A	5.66667	5.5	5.66667	6
P02	B	5	6	5	5	5	6	6	5	6	4	5	5	5	6	6	6	6	6	5.44444	5.375	5.16667	6		8	B	6.88889	7	6.66667	7
P03	B	7	7	7	7	7	7	7	7	7	7	7	7	7	7	7	7	7	7	7	7	7	7		8	C	4.72222	4.375	6	3.33333
P04	B	5	6	5	6	6	4	7	6	4	1	6	6	6	7	7	5	6	5	5.44444	5.625	5	6		9	A	4.94444	5.375	4.16667	5.33333
P05	B	6	6	6	6	6	6	6	6	6	6	6	6	6	6	6	6	6	6	6	6	6	6		9	B	5.61111	6.125	4.66667	6
P06	B	6	6	5	5	5	6	6	5	5	4	7	6	6	7	6	6	6	6	5.72222	5.5	5.83333	6		9	C	5.22222	5.25	5	5.33333
P07	B	3	3	3	2	3		4	4	3	3	3	5	3	4	3	2	4	2	3.17647	3.14286	3.5	3		10	A	5.61111	5	6.33333	6
P08	B	7	7	7	7	7	7	7	7	5	7	7	7	7	7	7	7	7	7	6.88889	7	6.66667	7		10	B	7	7	7	7
P09	B	7	6	6	6	6	6	6	6	4	4	5	5	5	5	6	6	6	6	5.61111	6.125	4.66667	6		10	C	6.22222	6	6.5	6.33333
P10	B	7	7	7	7	7	7	7	7	7	7	7	7	7	7	7	7	7	7	7	7	7	7		11	A	5	4.875	5.16667	5
P11	B	6	6	6	6	6	6	7	6	5	5	6	6	5	5	6	6	6	6	5.83333	6.125	5.33333	6		11	B	5.83333	6.125	5.33333	6
P12	B	6	6	5	5	6	6	6	6	5	4	5	5	6	4	5	5	6	6	5.38889	5.75	4.83333	5.33333		11	C	5.83333	6	5.5	6
P13	B	4	5	5	5	5	4	4	5	4	4	5	5	5	5	4	4	5	5	4.61111	4.625	4.66667	4.33333		12	A	4.33333	4.5	4.16667	4.33333
P14	B	6	7	6	7	7	6	7	7	7	6	7	7	7	7	7	6	7	7	6.72222	6.625	6.83333	6.66667		12	B	5.38889	5.75	4.83333	5.33333
P15	B	6	5	7	6	6	7	6	6	5	5	6	6	6	7	6	6	6	7	6.05556	6.125	5.83333	6		12	C	4.5	4.125	5.5	3.66667
P16	B	6	6	6	5	7	7	6	7	5	5	5	6	5	6	5	6	7	6	5.88889	6.25	5.33333	6		13	A	3.88889	3.5	4.33333	4
P17	B	4	5	5	4	4	3	4	5	5	4	5	6	6	5	4	3	5	4	4.5	4.25	5.16667	4		13	B	4.61111	4.625	4.66667	4.33333
P18	B	7	7	7	7	7	7	7	7	7	7	6	7	7	7	7	7	7	7	6.94444	7	6.83333	7		13	C	4.22222	4.5	3.83333	4
AVE		5.77778	5.88889	5.77778	5.66667	5.88889	6	6.05556	6.05556	5.33333	4.83333	5.77778	5.94444	5.77778	6.05556	5.88889	5.66667	6.16667	5.88889	5.79375	5.86905	5.62037	5.90741		14	A	5.61111	5.25	6.5	5
																									14	B	6.72222	6.625	6.83333	6.66667
P01	C	5	5	5	5	5	6	7	7	6	5	6	6	5	6	5	5	6	5	5.55556	5.625	5.66667	5.33333		14	C	6.44444	6.25	7	6
P02	C	6	6	6	6	6	6	6	6	6	6	6	6	6	6	6	6	6	6	6	6	6	6		15	A	5.5	5.5	5.33333	6
P03	C	6	6	6	6	6	6	6	6	6	6	6	6	6	6	6	7	6	6	6.05556	6	6	6.33333		15	B	6.05556	6.125	5.83333	6
P04	C	5	4	3	3	4	2	6	4	3	2	5	6	6	7	3	3	1	3	3.88889	3.875	4.83333	2.33333		15	C	5.27778	5	5.66667	5.33333
P05	C	6	6	6	6	6	5	5	6	6	6	6	6	6	5	5	5	6	5	5.66667	5.75	5.83333	5.33333		16	A	4.44444	4.125	5.33333	3.66667
P06	C	6	5	5	6	6	5	6	7	5	4	7	6	6	7	6	6	6	6	5.83333	5.75	5.83333	6		16	B	5.88889	6.25	5.33333	6
P07	C	5	4	3	3	4	5	5	4	2	3	3	3	4	4	4	4	4	3	3.72222	4.125	3.16667	4		16	C	5.77778	5.875	5.83333	5.66667
P08	C	5	5	4	3	3	5	7	3	4	5	7	7	7	6	4	2	4	4	4.72222	4.375	6	3.33333		17	A	6.55556	7	5.83333	7
P09	C	6	4	6	5	5	6	5	5	4	5	5	5	5	6	5	5	6	6	5.22222	5.25	5	5.33333		17	B	4.5	4.25	5.16667	4
P10	C	6	6	6	6	6	6	6	6	6	6	7	7	7	6	6	6	7	6	6.22222	6	6.5	6.33333		17	C	3.27778	2.75	4.16667	3.33333
P11	C	6	6	6	6	6	6	6	6	5	5	6	6	5	6	6	6	6	6	5.83333	6	5.5	6		18	A	5.55556	5.5	6	5
P12	C	3	5	3	3	4	5	7	3	6	6	5	5	6	5	4	3	4	4	4.5	4.125	5.5	3.66667		18	B	6.94444	7	6.83333	7
P13	C	5	5	5	4	4	4	4	5	4	3	3	4	5	4	4	4	4	5	4.22222	4.5	3.83333	4		18	C	6.55556	6.75	6	7
P14	C	5	7	6	6	7	6	7	6	7	7	7	7	7	7	6	5	7	6	6.44444	6.25	7	6
P15	C	5	3	6	4	5	6	5	6	6	6	5	6	6	5	6	4	6	5	5.27778	5	5.66667	5.33333
P16	C	5	6	5	6	7	5	7	6	5	5	6	6	6	7	5	5	7	5	5.77778	5.875	5.83333	5.66667
P17	C	3	3	3	2	3	3	2	3	4	5	3	4	4	5	3	1	6	2	3.27778	2.75	4.16667	3.33333
P18	C	6	7	7	6	7	7	7	7	6	6	5	5	7	7	7	7	7	7	6.55556	6.75	6	7
AVE		5.22222	5.16667	5.05556	4.77778	5.22222	5.22222	5.77778	5.33333	5.05556	5.05556	5.44444	5.61111	5.77778	5.83333	5.05556	4.66667	5.5	5	5.26543	5.22222	5.46296	5.07407
