# Supplementary material for: Performance, workload, and usability in a multiscreen, multi-device, information-rich environment
Source: PeerJ Comput Sci. 2018 Sep 10;4:e162. doi: 10.7717/peerj-cs.162 (PMC7924668; doi:10.7717/peerj-cs.162)
Supplement: Supplemental Information 3 [file peerj-cs-04-162-s003.xlsx]

## Sheet: Sheet1
	Location: Talladega
	Activity: Front Tire Carrier
	Date
	Analyst: Solution Set
	Event Description	Symbol					Time	Dist	Comments
1	Run to right side of car	¡	ð	D	o	s	1.2	200"
2	Wait for old tire to be removed	¡	ð	D	o	s	1.8
3	Place new tire on car	¡	ð	D	o	s	1
4	Grab old rear tire from jackman	¡	ð	D	o	s	0.5
5	Grad old front tire from tire changer	¡	ð	D	o	s	0.5
6	Transport both tires to pit wall	¡	ð	D	o	s	2	194"
7	Grab new tire from pit wall	¡	ð	D	o	s	0.25
8	Take new tire to car	¡	ð	D	o	s	0.25	53"
9	Wait for old tire to be removed	¡	ð	D	o	s	1.5
10	Place new tire on the car	¡	ð	D	o	s	1
11	Move to the front of car		ð				0.5	50"
12	Clean/brush off grill of car	¡	ð	D	o	s	2
13	Signal (thumbs-up) for driver to go	¡	ð	D	o	s	0.2
14		¡	ð	D	o	s
15		¡	ð	D	o	s
16		¡	ð	D	o	s
17		¡	ð	D	o	s
18		¡	ð	D	o	s
19		¡	ð	D	o	s
20		¡	ð	D	o	s
21		¡	ð	D	o	s
22		¡	ð	D	o	s
23		¡	ð	D	o	s
24		¡	ð	D	o	s
25		¡	ð	D	o	s
26		¡	ð	D	o	s
27		¡	ð	D	o	s
28		¡	ð	D	o	s
29		¡	ð	D	o	s
30		¡	ð	D	o	s
34		¡	ð	D	o	s
35		¡	ð	D	o	s
	Totals						12.7	497
