# Supplementary material for: Performance, workload, and usability in a multiscreen, multi-device, information-rich environment
Source: PeerJ Comput Sci. 2018 Sep 10;4:e162. doi: 10.7717/peerj-cs.162 (PMC7924668; doi:10.7717/peerj-cs.162)
Supplement: Supplemental Information 4 [file peerj-cs-04-162-s004.xlsx]

## Sheet: Sheet1
	Location: Talladega
	Activity: Jackman
	Date:
	Analyst: Solution Set
	Event Description	Symbol					Time	Dist	Comments
1	Run to right side of car	¡	ð	D	o	s	1.5	249"
2	Line the jack up with car	¡	ð	D	o	s	0.5
3	Jack the car up	¡	ð	D	o	s	1.5
4	Wait for old tire to be removed	¡	ð	D	o	s	0.5
5	Grab old tire from rear and transport it to front of car	¡	ð	D	o	s	1
6	Give the old tire to front tire carrier	¡	ð	D	o	s	0.5
7	Grab jack and drop car	¡	ð	D	o	s	1
8	Run to opposite side of the car	¡	ð	D	o	s	2	292"
9	Line the jack up with car	¡	ð	D	o	s	0.5
10	Jack the car up	¡	ð	D	o	s	1.5
11	Control the old front tire	¡	ð	D	o	s	0.5
12	Wait for all tires and gas operations to be complete	¡	ð	D	o	s	1
13	Drop the car from the jack and pull jack away from car	¡	ð	D	o	s	1
14		¡	ð	D	o	s
15		¡	ð	D	o	s
16		¡	ð	D	o	s
17		¡	ð	D	o	s
18		¡	ð	D	o	s
19		¡	ð	D	o	s
20		¡	ð	D	o	s
21		¡	ð	D	o	s
22		¡	ð	D	o	s
23		¡	ð	D	o	s
24		¡	ð	D	o	s
25		¡	ð	D	o	s
26		¡	ð	D	o	s
27		¡	ð	D	o	s
28		¡	ð	D	o	s
34		¡	ð	D	o	s
35		¡	ð	D	o	s
	Totals						13	549"
