# Supplementary material for: Performance, workload, and usability in a multiscreen, multi-device, information-rich environment
Source: PeerJ Comput Sci. 2018 Sep 10;4:e162. doi: 10.7717/peerj-cs.162 (PMC7924668; doi:10.7717/peerj-cs.162)
Supplement: Supplemental Information 5 [file peerj-cs-04-162-s005.xlsx]

## Sheet: Sheet1
	Location: Talladega
	Activity: Rear Tire Carrier
	Date
	Analyst: Solution Set
	Event Description	Symbol					Time	Dist	Comments
1	Carry tire to right side of the car	¡	ð	D	o	s	2	208"
2	Put wedge device in rear windshield	¡	ð	D	o	s	0.5
3	Wait for old tire to be removed	¡	ð	D	o	s	2
4	Place new tire on car	¡	ð	D	o	s	1.5
5	Turn the wedge tool in windshield	¡	ð	D	o	s	1
6	Take wedge tool out of windshield	¡	ð	D	o	s	0.5
7	Run to other side of car	¡	ð	D	o	s	1	220"
8	Gain control of tire next to jack man	¡	ð	D	o	s	0.5
9	Move new tire to car		ð				0.5	12"
10	Wait for old tire to be removed	¡	ð	D	o	s	1.5
11	Place new tire on car	¡	ð	D	o	s	1.5
12	Step away from car	¡	ð	D	o	s	1	12"
13		¡	ð	D	o	s
14		¡	ð	D	o	s
15		¡	ð	D	o	s
16		¡	ð	D	o	s
17		¡	ð	D	o	s
18		¡	ð	D	o	s
19		¡	ð	D	o	s
20		¡	ð	D	o	s
20		¡	ð	D	o	s
21		¡	ð	D	o	s
22		¡	ð	D	o	s
23		¡	ð	D	o	s
24		¡	ð	D	o	s
25		¡	ð	D	o	s
26		¡	ð	D	o	s
27		¡	ð	D	o	s
28		¡	ð	D	o	s
29		¡	ð	D	o	s
	Totals						13.5	452
